# Supplementary material
Source: publisher site journal article supplement (https://www.dovepress.com/article/368960)
Supplement: Supplementary file 1 [file get_supplementary_file.php]

## Supplementary Data

## Material and methods

## Rheological characterization of the polymeric solutions for electrospinning

Rheological measurements were carried out on the polymeric solutions by means of a rotational rheometer as previously described in the section “Characterization of GG/SP mixtures”.

Viscosity measurements were performed at increasing shear rates in the range 10–1000 s−1 at 30°C. Three replicates were considered for each sample.

## Results and discussion

In Figure 1S, flow (a) and viscosity (b) curves of all the polymeric solutions subjected to the electrospinning process are reported. S3 and S solutions show similar profiles; on the contrary, S4 solution, containing a higher SP concentration than S3, shows a profile slightly higher than S and S3 ones.

**a)**

**b)**

**Figure 1S** **a)** Flow and **b)** viscosity curves of S, S3 and S4 polymeric solutions. Data are expressed as mean ± SE (n=3).
